# Supplementary material for: Critical fluctuations in liquid–liquid extraction organic phases controlled by extractant and diluent molecular structure
Source: Royal Society of Chemistry journal article supplement (doi:10.1039/d3cp01029e), 2023-01-01
Supplement: d3cp01029e1.pdf [file d3cp01029e1.pdf]

# Supporting Information for: Critical Fluctuations in Liquid-Liquid Extraction Organic Phases Controlled by Extractant and Diluent Molecular Structure

Brittany L. Bonnett,<sup>†</sup> Dina Sheyfer,<sup>‡</sup> Pubudu N. Wimalasiri,<sup>†</sup> Srikanth Nayak,<sup>†</sup>  
Jyotsana Lal,<sup>¶,§</sup> Qingteng Zhang,<sup>‡</sup> Soenke Seifert,<sup>‡</sup> G. Brian Stephenson,<sup>\*,¶</sup> and  
Michael J. Servis<sup>\*,†</sup>

<sup>†</sup>*Chemical Sciences and Engineering Division, Argonne National Laboratory, Lemont, IL  
60439, USA*

<sup>‡</sup>*X-ray Science Division, Argonne National Laboratory, Lemont, IL 60439, USA*

<sup>¶</sup>*Materials Science Division, Argonne National Laboratory, Lemont, IL 60439, USA*

<sup>§</sup>*Department of Physics, Northern Illinois University, DeKalb, IL 60115, USA*

E-mail: gbs@anl.gov; mservis@anl.gov

Table S1: The concentrations and volume fractions ( $\varphi_E$ ) for each mixture are provided for reference.

| Extractant | conc. [mol/L] | vol. frac., $\varphi_E$ |
|------------|---------------|-------------------------|
| DMDBPMA    | 0.30          | 0.10                    |
| DMDBPMA    | 0.60          | 0.20                    |
| DMDBPMA    | 0.90          | 0.30                    |
| DMDBPMA    | 1.20          | 0.40                    |
| DMDBPMA    | 1.50          | 0.50                    |
| DMDBPMA    | 1.79          | 0.60                    |
| DMDBPMA    | 2.09          | 0.70                    |
| DMDBPMA    | 2.39          | 0.80                    |
| DMDBPMA    | 2.69          | 0.90                    |
| DMDBPMA    | 2.99          | 1.00                    |
| DMDBTDMA   | 0.20          | 0.10                    |
| DMDBTDMA   | 0.30          | 0.15                    |
| DMDBTDMA   | 0.40          | 0.19                    |
| DMDBTDMA   | 0.50          | 0.24                    |
| DMDBTDMA   | 0.60          | 0.29                    |
| DMDBTDMA   | 0.80          | 0.39                    |
| DMDBTDMA   | 1.00          | 0.48                    |
| DMDBTDMA   | 1.66          | 0.80                    |
| DMDBTDMA   | 2.07          | 1.00                    |

Table S2: Compositions for the molecular dynamics simulations are given in concentration, extractant mole fraction  $\chi_M$ , and extractant volume fraction  $\varphi_E$ , along with the number of DMDBPMA and dodecane molecules and periodic box sizes.

| DMDBPMA       |          |             |      | <i>n</i> -Dodecane | Simulation box          |
|---------------|----------|-------------|------|--------------------|-------------------------|
| conc. [mol/L] | $\chi_M$ | $\varphi_E$ | num. | num.               | length [ $\text{\AA}$ ] |
| 0.25          | 0.06     | 0.08        | 151  | 2430               | 98.9                    |
| 0.54          | 0.13     | 0.18        | 325  | 2174               | 99.1                    |
| 1.25          | 0.33     | 0.42        | 753  | 1545               | 99.4                    |
| 3.03          | 1.00     | 1.00        | 1825 | 0                  | 100.6                   |

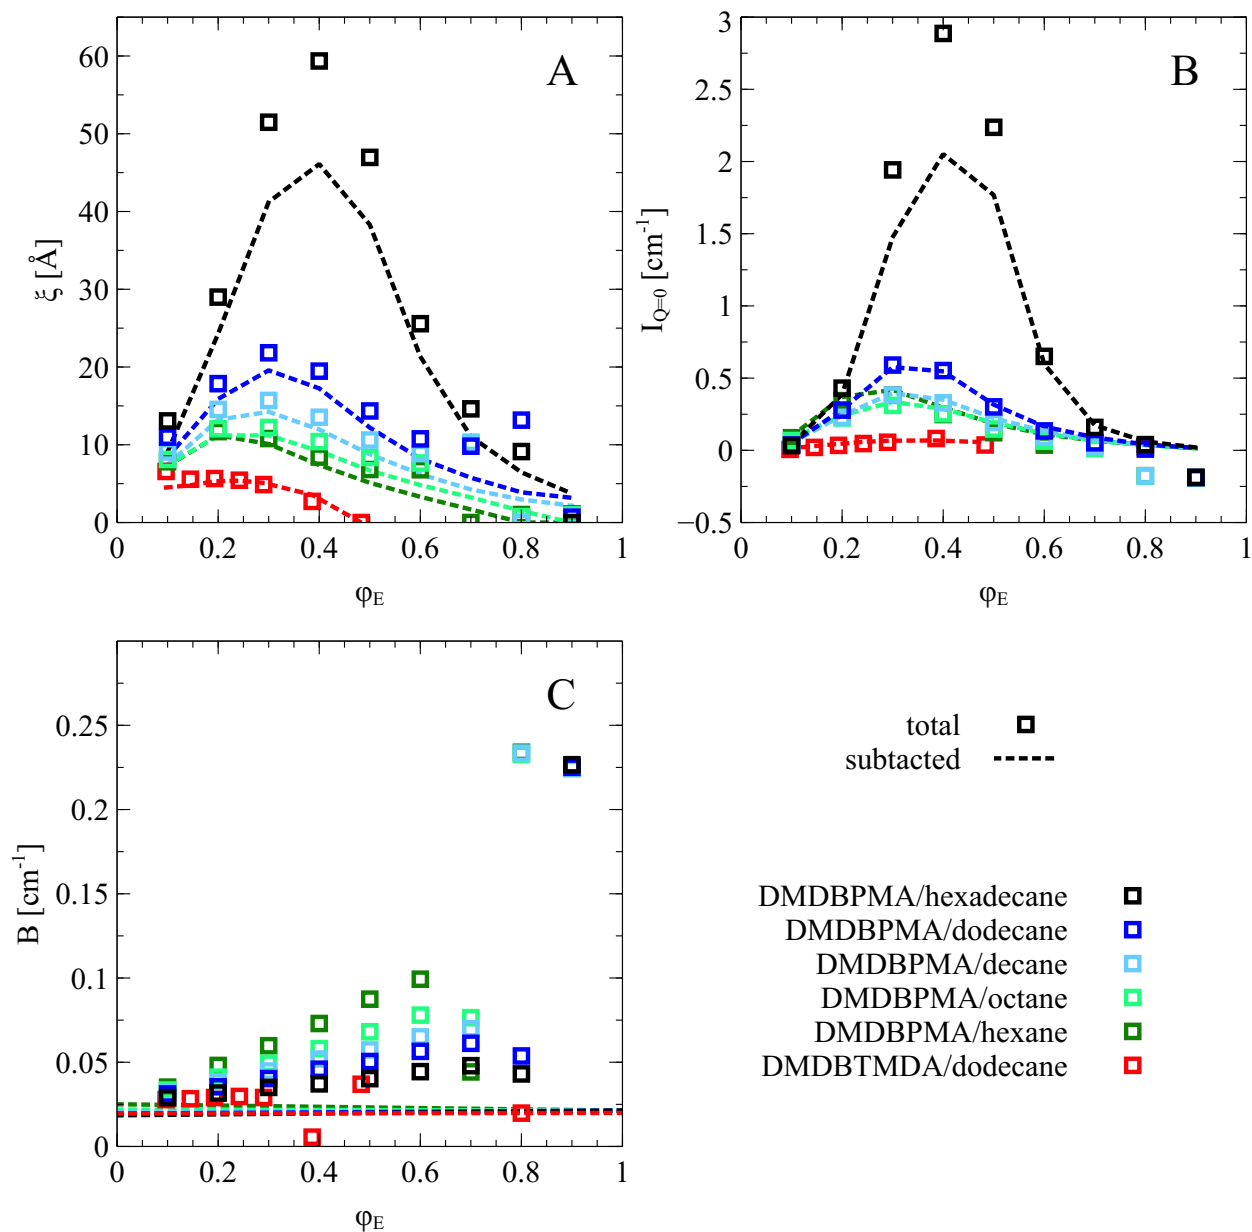

Figure S1: Comparison of  $\xi$  (panel A) and  $I_{Q=0}$  (panel B) from both fitting methods (equation 1 with squares and equation 2 with dotted lines) for each mixture. Panel C shows the fitted  $B$  parameter (equation 1, squares) compared to the weighted average of  $I_{Q=0}$  for the pure components (dotted lines).
